# Supplementary material for: Depression, Anxiety, Stress, and Health-Related Quality of Life Among Patients With Medication Overuse Headache in a Tertiary Headache Center: A Cross-Sectional Study
Source: Atypon-hosted journal article supplement (doi:10.1176/appi.neuropsych.20070189), 2021-02-25
Supplement: appi.neuropsych.20070189.ds001.pdf [file appi.neuropsych.20070189.ds001.pdf]

**Supplement Table S1. Correlations of HIT–6, depression, anxiety, stress, and quality of life**

|            |         | Depressin    | Anxiety          | Stress           | Physical functioning | Role functioning/physical | Role functioning/emotional | Energy/fatigue   | Emotional well-being | Social functioning | Pain             | General health   |
|------------|---------|--------------|------------------|------------------|----------------------|---------------------------|----------------------------|------------------|----------------------|--------------------|------------------|------------------|
| HIT–6      | r       | 0.306        | 0.184            | 0.119            | -.347**              | -.449**                   | -0.062                     | -0.150           | -0.104               | -.336**            | -.270*           | -0.102           |
|            | p-value | <b>0.025</b> | 0.096            | 0.285            | <b>0.001</b>         | <b>&lt;0.001</b>          | 0.576                      | 0.177            | 0.348                | <b>0.002</b>       | <b>0.013</b>     | 0.360            |
| Depression | r       | 1.000        | 0.808**          | 0.702**          | 0.425***             | -0.340                    | -0.463**                   | -0.464**         | -0.701**             | -0.531**           | -0.524**         | -0.411**         |
|            | p-value |              | <b>&lt;0.001</b> | <b>&lt;0.001</b> | <b>&lt;0.001</b>     | <b>0.002</b>              | <b>&lt;0.001</b>           | <b>&lt;0.001</b> | <b>&lt;0.001</b>     | <b>&lt;0.001</b>   | <b>&lt;0.001</b> | <b>&lt;0.001</b> |
| Anxiety    | r       |              | 1.000            | 0.710**          | -0.408**             | -0.333**                  | -0.441**                   | -0.448**         | -0.594**             | -0.574**           | -0.522**         | -0.362**         |
|            | p-value |              |                  | <b>&lt;0.001</b> | <b>&lt;0.001</b>     | <b>0.002</b>              | <b>&lt;0.001</b>           | <b>&lt;0.001</b> | <b>&lt;0.001</b>     | <b>&lt;0.001</b>   | <b>&lt;0.001</b> | <b>0.001</b>     |
| Stress     | r       |              |                  | 1.000            | -0.260*              | -0.233*                   | -0.384**                   | -0.430**         | -0.583**             | -0.481**           | -0.509**         | -0.277*          |
|            | p-value |              |                  |                  | <b>0.018</b>         | <b>0.034</b>              | <b>&lt;0.001</b>           | <b>&lt;0.001</b> | <b>&lt;0.001</b>     | <b>&lt;0.001</b>   | <b>&lt;0.001</b> | <b>0.011</b>     |

N=83, r- correlation coefficient, \*\* p<0.01, \* p<0.05

Correlation analysis showed that HIT–6 correlated significantly with the duration of previous chronic headache before the onset of MOH (r=0.327, p=0.003). HIT–6 correlated significantly with depression (r=0.306, p=0.025), with physical functioning (r=-0.347, p=0.001), with role functioning / physical (r=-0.449, p<0.001), social functioning (r=-0.336, p=0.002), and pain (r=-0.270, p=0.013). Depression, anxiety, and stress correlated statistically significantly with all domains tested.
